# A distinct population of L6 neurons in mouse V1 mediate cross-callosal communication

Yajie Liang<sup>1</sup>, Wenzhi Sun<sup>1,4,5</sup>, Rongwen Lu<sup>1</sup>, Ming Chen<sup>5</sup>, and Na Ji<sup>1,2,3,6\*</sup>

<sup>1</sup>Janelia Research Campus, Howard Hughes Medical Institute, Ashburn, Virginia, USA.

<sup>2</sup>Department of Physics, Department of Molecular and Cell Biology, Helen Wills Neuroscience Institute, University of California, Berkeley, California, USA

<sup>3</sup>Lawrence Berkeley National Laboratory, Berkeley, California, USA

<sup>4</sup>Chinese Institute for Brain Research, Beijing, China

<sup>5</sup>iHuman Institute, ShanghaiTech University, Shanghai, China

<sup>6</sup>Lead Contact

\*Correspondence: [jina@berkeley.edu](mailto:jina@berkeley.edu)

## Abstract

Through the corpus callosum, interhemispheric communication is mediated by callosal projection (CP) neurons. Using retrograde labeling, we identified a population of layer 6 (L6) excitatory neurons as the main conveyer of transcallosal information in the monocular zone of the mouse primary visual cortex (V1). Distinct from L6 corticothalamic (CT) population, V1 L6 CP neurons contribute to an extensive reciprocal network across multiple sensory cortices over two hemispheres. Receiving both local and long-range cortical inputs, they encode orientation, direction, and receptive field information, while are also highly spontaneous active. The spontaneous activity of L6 CP neurons exhibits complex relationships with brain states and stimulus presentation, distinct from the spontaneous activity patterns of the CT population. The anatomical and functional properties of these L6 CP neurons enable them to broadcast visual and nonvisual information across two hemispheres, and thus play a major role in regulating and coordinating brain-wide activity events.

## 30 Introduction

31 As the largest bundle of axonal fibers in the mammalian brain, the corpus callosum mediates  
32 interhemispheric communications through axonal projections between cortices of the frontal, parietal,  
33 occipital, and temporal lobes<sup>1</sup>. Early anatomical studies suggested that callosal projection (CP) neurons are  
34 primarily L2/3 or L5 neurons projecting homotopically to the contralateral cortex<sup>2, 3, 4</sup>. Later functional  
35 studies indicated that these neurons participate in collaborative processing of information across the  
36 hemispheres. For sensory cortices, the transcallosal pathways are thought to enable the processing of  
37 bilateral sensory stimuli. For example, CP neurons in the somatosensory cortex were found to mediate  
38 bilateral integration of tactile information<sup>5, 6</sup>. In the auditory cortex, CP neurons were shown to contribute  
39 to sound localization in spatial hearing<sup>7</sup>.

40 In visual cortices, callosal connections highly concentrate at the borders between the primary and  
41 secondary visual cortices<sup>2, 8, 9</sup>. Because this border region contains a representation of the vertical midline  
42 of visual field, these CP neurons, mainly located in L2/3 and L5, were considered to be involved in  
43 binocularity and fusion of visual fields<sup>8, 10, 11, 12</sup>. Inactivation experiments indicated that these callosal inputs  
44 strongly modulate visual cortical responses<sup>12, 13, 14</sup>. However, whether and how the monocular V1  
45 contributes to callosal projection remains little known. In rodents, the monocular part of V1 was initially  
46 considered as acallosal<sup>2</sup>. CP neurons were later found throughout the deep infragranular layer in V1<sup>15, 16</sup>.  
47 Compared to other cortical cell types, very little is known about the identity, connectivity, or activity of  
48 these CP cells<sup>17</sup>.

49 In this study, we used a high-efficiency recombinant AAV variant to gain genetic access to CP neurons  
50 in the mouse monocular V1, studied their connectivity profiles with a combination of viral strategies, and  
51 characterized their activity in awake mice using *in vivo* calcium imaging. We found that V1 CP neurons  
52 were concentrated in L6 and formed a distinct population from the *NTSR1*-positive corticothalamic (CT)  
53 L6 neurons. Instead of being homotopic, L6 CP neurons formed an extensive network, projecting to and  
54 receiving inputs from multiple cortical regions of different sensory modalities. We used rabies viral tracing  
55 to identify their presynaptic partners and found cells in both local V1 circuit and long-range cortical areas.  
56 Although a substantial proportion of L6 CP neurons encoded visual features such as orientation tuning and  
57 possessed well-defined receptive fields, an even larger fraction exhibited spontaneous activity that was  
58 often modulated by the presence of visual stimuli. Whereas the spontaneous activity of CT population in  
59 the dark was highly positively correlated with the arousal level of the animal, we found that the spontaneous  
60 activity of CP neurons exhibited a richer repertoire, suggestive of a multisensory or higher cognitive origin.

## 61 **Results**

### 62 **CP neurons in mouse V1 are dominantly located in L6**

63 Traditionally, CP neurons were labeled with intra-parenchymal injection of retrograde tracers, such as  
64 horseradish peroxidase or Fluoro-Gold (FG), with varying efficacy<sup>18</sup>. To label CP neurons with high  
65 efficacy, we took advantage of a recently developed recombinant AAV variant (rAAV2-retro) that permits  
66 efficient retrograde access to projection neurons<sup>19</sup>. We injected rAAV2-retro carrying GFP (rAAV2-  
67 retro.CAG.GFP) into the monocular zone of right V1 of a transgenic mouse line with L5 excitatory neurons  
68 labeled with H2B-mCherry (Rbp4-Cre × Rosa26 LSL CAG H2B mCherry<sup>20</sup>). We observed brightly labeled  
69 CP neurons in the left monocular V1 predominantly located in the cortical layer below L5, with few cells  
70 in the supragranular layer (L2/3) (**Figure 1A**). More superficial CP neurons were observed at the border of  
71 V1 and V2L, consistent with earlier studies<sup>2,8,9</sup>. Immunostaining with anti-GABA antibody indicated that  
72 these neurons were not GABAergic (**Supplementary Figure 1A and 1B**). Therefore, CP neurons in mouse  
73 V1 are dominantly excitatory neurons located in L6.

### 74 **L6 CP neurons and *NTSR1*-positive CT neurons are distinct populations**

75 Having identified L6 neurons as the main callosal-projecting neurons in mouse monocular V1, we then  
76 asked whether these CP neurons were distinct from the thalamus-projecting L6 CT neurons. To this end,  
77 we utilized a Cre-recombinase transgenic mouse line *NTSR1*-Cre (*NTSR1*-cre GN220) that selectively  
78 labels L6 CT neurons in V1<sup>21,22,23</sup>. Crossed with the Cre reporter line Ai14<sup>24</sup>, the resulting mice had L6 CT  
79 neurons expressing red fluorescent protein tdTomato. Injecting rAAV2-retro.syn.GFP in the right V1 and  
80 labeling CP neurons in the left hemisphere, we similarly observed that CP neurons were mostly located in  
81 L6 (**Figure 1B**), with high-resolution image stacks showing a clear separation of CP and CT neurons in V1  
82 (**Figure 1C**). Similar separation was also observed with FG as the retrograde tracer (**Supplementary**  
83 **Figure 1C and 1D**).

84 Counting the number of cells along the cortical depth, we found slightly different distributions for these  
85 two groups of neurons: more CP neurons were found in superficial L6, while there were more CT neurons  
86 at depth (**Figure 1D**). In the same fields-of-view (FOVs), CT neurons were ~nine times denser than CP  
87 (median = 9.0, interquartile range IQR = 3.0, 4 mice, 9 FOVs, **Figure 1E**). On average, CP neurons had  
88 significantly larger somata (Wilcoxon signed-rank test,  $p < 0.01$ , 10 FOVs from 4 mice, **Figure 1F**),  
89 consistent with the data from CP neurons in the rat somatosensory cortex<sup>25</sup>. Contralateral injection of  
90 rAAV2-retro.syn.Cre and ipsilateral injection of AAV2/1.syn.FLEX.GCaMP6s labeled CP neurons with  
91 green fluorescent protein GCaMP6. The dendrites of some CP neurons extended into L5 (**Figure 1G, left**

92 **panel)** and their projections to the contralateral cortex are mainly localized in the infragranular layers  
 93 **(Figure 1G, right panel).**

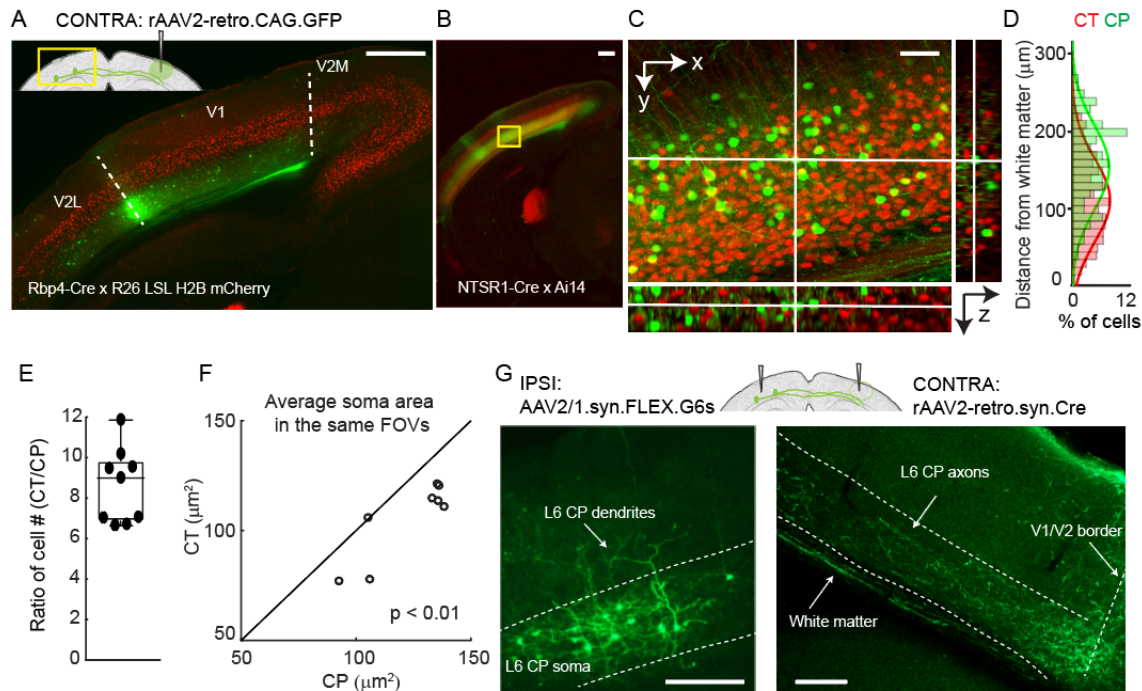

**Figure 1. A distinct population of callosal projection (CP) neurons in L6 of the mouse monocular V1**

(A, B) Fluorescence images of left V1 after rAAV2-retro.CAG.GFP injection in contralateral (CONTRA) V1 with (A) L5 pyramidal neurons labeled with H2B-mCherry (Rbp4-Cre × R26 LSL H2B mCherry) and (B) L6 corticothalamic (CT) neurons labeled with tdTomato (NTSR1-Cre × Ai14), respectively.

(C) Magnified and orthogonal views of the yellow box area in (B) (CP in green, CT in red).

(D) Depth-dependence of CT and CP somata distributions measured by cell counting from the volume in (C). 515 CT neurons and 80 CP neurons were counted.

(E) Ratio of cell counts (CT versus CP) from the same fields-of-view (FOVs), n = 4 mice (1-2 FOVs from each mouse, 4,718 CT and 611 CP neurons in 9 FOVs).

(F) Cell size comparison between CP and CT neurons in the same FOVs. 4,440 CT and 802 CP neurons in 9 FOVs from 4 mice. Wilcoxon signed-rank test, p = 0.0078.

(G) Contralateral injection of rAAV2-retro.syn.Cre and ipsilateral injection of AAV2/1.syn.FLEX.GCaMP6s labeled CP neurons (left panel) in ipsilateral (IPSI) V1 and (right panel) their axons in contralateral V1 (axon image taken after additional immunostained with anti-GFP antibody).

Dashed lines: (A, G) V1/V2 borders and cortical layers. Scale bar: 500 μm in (A, B); 50 μm in (C); 200 μm in (G).

95 **L6 CP neurons contribute to a horizontal network interconnecting multiple cortical areas across the**  
96 **two hemispheres**

97 Having discovered that V1 receives inputs from L6 CP neurons of contralateral V1, we then asked whether  
98 there were other sources of transcallosal inputs into V1. We unilaterally injected rAAV2-retro.CAG.GFP  
99 into V1 of NTSR1-Cre  $\times$  Ai14 mice, where L6 CT neurons expressed tdTomato, and found that in addition  
100 to contralateral V1, neurons in secondary visual cortical areas (V2M and V2L), auditory cortex (AuC), and  
101 ectorhinal cortex (Ect) in the contralateral hemisphere also projected to V1 (**Figure 2A**). As in contralateral  
102 V1 (**Figure 2B**), the CP neurons in the other cortical areas were also distinct from CT neurons (**Figure 2C,**  
103 **2D**). Interestingly, the CP populations in the contralateral primary and secondary visual cortices were all  
104 located in L6 (**Figure 2C**), whereas the CP neurons from AuC and Ect appeared to concentrate in L5  
105 (**Figure 2D**).

106 Injecting rAAV2-retro.CAG.GFP in V2M, V2L, or AuC cortices, we found similarly widespread  
107 staining of CP neurons in the contralateral cortex spanning multiple sensory modalities (**Figure 2E, 2F,**  
108 **and 2G**). Similar to V1, the extrastriate cortical areas used to be considered as acallosal due to their lack of  
109 superficial CP neurons<sup>9</sup>. Here we found that their visual cortical transcallosal communication was similarly  
110 subserved by L6 neurons, consistent with another study using a chemical tracer<sup>26</sup>. In AuC, in addition to  
111 CP neurons in contralateral AuC, L6 neurons in V1, V2M, and V2L also provided transcallosal inputs. We  
112 observed a bias in the CP neuron distribution with respect to sensory modality: more CP neurons were  
113 found between cortices processing sensory information of the same type than different types (e.g., visual  
114 vs. auditory). Together, these results indicated that V1 not only received widespread transcallosal  
115 projections from contralateral cortical regions, but also sent projections to these areas (**Figure 2H**) via L6  
116 neurons. Therefore, L6 CP neurons contribute to a horizontal network interconnecting cortical regions  
117 representing multiple sensory modalities across the two hemispheres, and may play a role in  
118 interhemispheric cross-modal sensory integration.

119

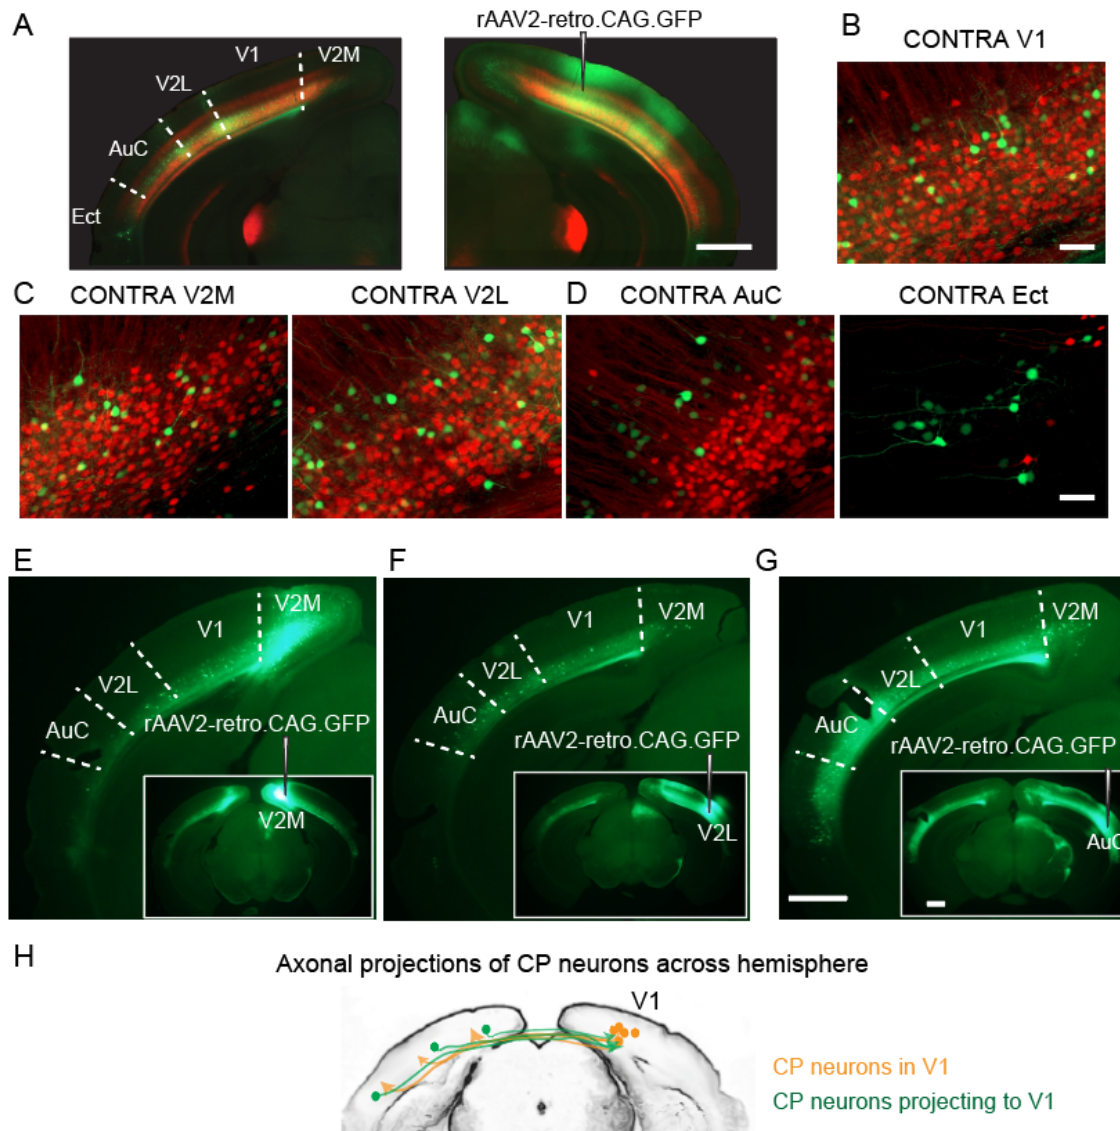

**Figure 2. Extensive callosal projections to and from V1**

(A) Unilateral injection of rAAV2-retro.CAG.GFP into right V1 of NTSR1-Cre  $\times$  Ai14 mice, with CT neurons expressing tdTomato (red) and CP neurons in multiple cortical areas of the left hemisphere labeled with GFP (green).

(B, C, D) Example coronal images of left V1, V2M, V2L, AuC, and Ect, respectively.  $n = 2$  mice.

(E, F, G) Example coronal images of retrogradely labeled L6 CP neurons after injection of rAAV2-retro.CAG.GFP into V2M, V2L, or AuC.  $n = 2$  mice for each group.

(H) Schematic showing callosal projection patterns to and from V1.

Scale bars: 1 mm in (A, E, F, G); 50  $\mu$ m in (B, C, D).

## 121 L6 CP neurons receive both local and long-range cortical inputs

122 The above retrograde labeling experiments with rAAV2-retro vectors revealed the diverse transcallosal  
 123 projection targets of L6 CP neurons in V1. We next investigated their upstream inputs using rabies viral  
 124 tracing<sup>27</sup>. We used rAAV2-retro.syn.cre to express Cre recombinase in L6 CP neurons in wildtype mouse  
 125 V1. We also utilized the Scnn1a-Cre transgenic mouse line that expressed Cre recombinase in L4 pyramidal  
 126 neurons in V1. Injections of Cre-dependent AAV helper vectors drove expression of glycoprotein (G), avian  
 127 receptor protein (TVA), and blue fluorescent protein (BFP) in the starter cell population expressing Cre.  
 128 Three weeks later, we injected a glycoprotein deficient form of the rabies virus encapsulated with the avian  
 129 sarcoma and leucosis virus envelope protein ( $\Delta$ RV), which expressed mCherry in neurons presynaptic to  
 130 the starter cells as well as the starter cells themselves. Consequently, the starter cells were identified as  
 131 those expressing both BFP and mCherry, and the presynaptic cells were those labeled only with mCherry.  
 132 The mice were perfused a week later and the brains sectioned and imaged to chart the spatial locations of  
 133 the presynaptic neurons (**Figure 3A**).

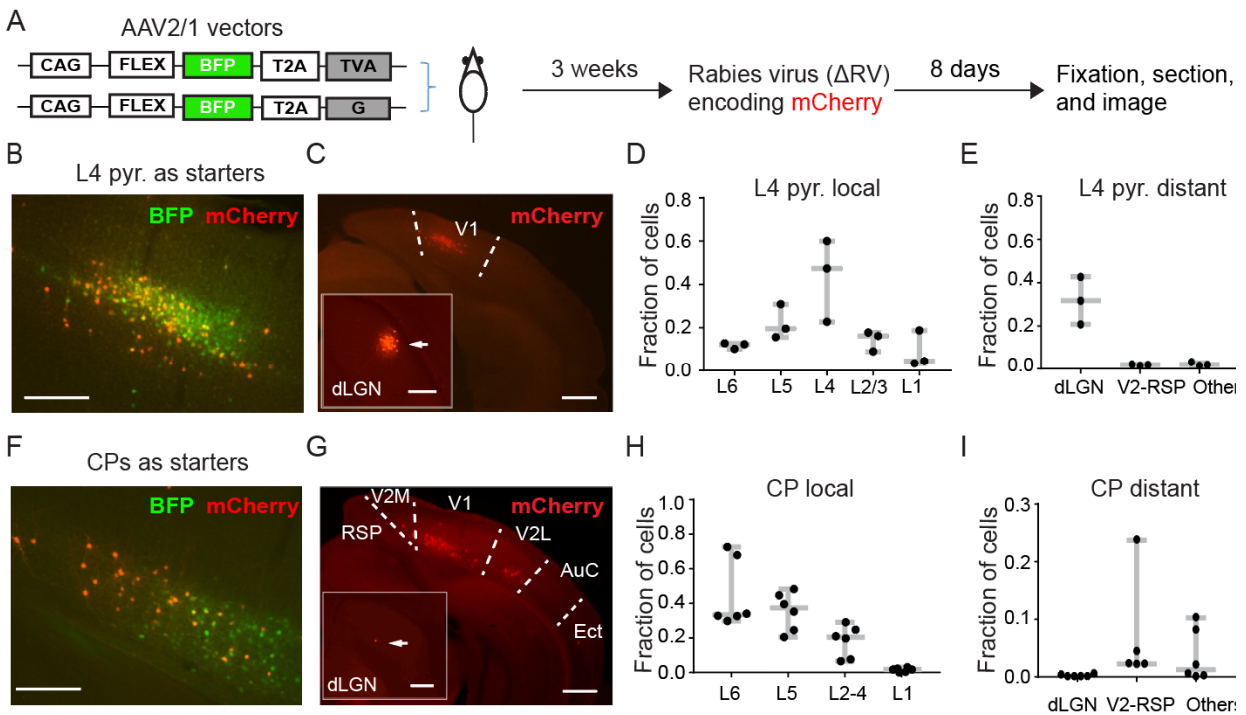

**Figure 3 Presynaptic partners of V1 L6 CP neurons from the ipsilateral hemisphere.**

(A) Schematic showing the experimental procedure. Starter cells were double-labeled by BFP and mCherry. mCherry<sup>+</sup>-only labeling indicated presynaptic partners of starter neurons.

(B, C) Example fluorescence images of coronal brain sections with (B) L4 pyramidal neurons as starter cells and (C) their presynaptic neurons ipsilateral to the injection site. Arrows in insets of (C) pointing to presynaptic cells in dLGN.

(D, E) Fractions of (D) local (within V1) and (E) distant presynaptic neurons of L4 pyramidal neurons.

(F, G) Example fluorescence images of coronal brain sections with (F) CP neurons as starter cells and (G) their presynaptic neurons ipsilateral to the injection site. Arrows in insets of (G) pointing to presynaptic cells in dLGN.

(H, I) Fractions of (H) local (within V1) and (I) distant presynaptic neurons of L6 CP neurons.

Scale bars: 200  $\mu\text{m}$  in (B, F) and insets of (C, G); 500  $\mu\text{m}$  in (C, G).

134 To validate our rabies tracing method, we investigated the presynaptic cell population for L4 pyramidal  
135 neurons. With L4 pyramidal cells as the starter cells (**Figure 3B**), we observed prominent local (493 out of  
136 726 mCherry<sup>+</sup> cells, n = 3 mice, **Figure 3C** and **3D**) and long-range presynaptic cells (especially in dLGN,  
137 214 out of 726 mCherry<sup>+</sup> cells, n = 3 mice, **Figure 3C** inset and **Figure 3E**). This agreed with the known  
138 connectivity of these neurons<sup>28</sup> and confirmed the validity of our rabies tracing method.

139 With CP cells in V1 as starter cells (**Figure 3F**), we found strong local V1 inputs (2,150 out of 2,459  
140 mCherry<sup>+</sup> cells, n = 6 mice, **Figure 3G** and **3H**), as well as substantial ipsilateral long-range inputs from  
141 V2 (V2M, V2L) and retrosplenial cortex (RSP) (262 out of 2,459 mCherry<sup>+</sup> cells, n = 6 mice) as well as  
142 auditory cortex (AuC) and entorhinal cortex (Ect) (47 out of 2,459 mCherry<sup>+</sup> cells, n = 6 mice; **Figure 3G**  
143 and **3I**). We also found a few presynaptic neurons in the contralateral hemisphere located in the  
144 infragranular layer (**Supplementary Figure 2**). These results indicate that CP neurons receive both local  
145 V1 and long-range cortical inputs. Together with the rAAV2-retro experiments, these results suggested that  
146 CP neurons receive both local and long-range cortical inputs, while simultaneously transferring information  
147 to and integrating information from CP neurons in the contralateral hemisphere. Thereby, they form a  
148 functional network that mediates cross-callosal information processing, allowing V1 in each hemisphere to  
149 receive information from multiple cortical areas in its own as well as from the contralateral hemispheres.

150

## 151 **Visually-evoked responses of L6 CP and CT neurons in V1 of awake mice**

152 Having characterized the L6 CP neurons anatomically, we then investigated their visually-evoked responses  
153 and compared them with L6 CT neurons, using *in vivo* calcium imaging (**Figure 4**). L6 CT neurons in V1  
154 of the left hemisphere were transfected with the calcium indicator GCaMP6s<sup>29</sup> by injecting  
155 AAV2/1.syn.FLEX.G6s in V1 of the NTSR1-Cre mouse (**Figure 4B**). L6 CP neurons were labeled using  
156 the same approach as described above (AAV2/1.syn.FLEX.GCaMP6s in left V1 and rAAV2-retro.syn.Cre  
157 in the contralateral V1, **Figure 4D**). Presenting drifting gratings to the right eye (100% contrast, 6 s drifting  
158 gratings interleaved with 6 s stationary gratings, 0.07 cycles per degree, 2 Hz, 12 directions with 10 trials  
159 each in a pseudorandom sequence), we then measured changes in fluorescence brightness ( $\Delta F/F$ ) in the cell  
160 bodies of the GCaMP6s<sup>+</sup> neurons in quietly awake mice after habituating them to head fixation. Imaging  
161 CP and CT neurons at depths ranging from 550 to 650  $\mu\text{m}$  below dura with a homebuilt two-photon



162 fluorescence microscope optimized for deep imaging<sup>30</sup> (**Figure 4C, 4E**), we identified neurons with  
163 detectable calcium transients. A neuron was considered as visually-evoked if its activity during at least one  
164 drifting grating stimulus was significantly higher than their activity during the inter-stimulus stationary-  
165 grating period by paired t test ( $p < 0.01$ )<sup>31</sup>; otherwise, it is considered to be non-visually evoked  
166 (spontaneously active). Under this criterion, we found 62% of active CT neurons (792/1282, 10 mice) and  
167 26% of active CP neurons (483/1876, 17 mice) to exhibit visually evoked responses, and focused our current  
168 analysis on these visually responsive neurons.

169 Consistent with an earlier electrophysiological study<sup>32</sup>, we found CT neurons to select for grating  
170 orientation and drifting direction (**Figure 4F**). We also found CP neurons whose activity depended on the  
171 orientation and moving direction of the drifting gratings (**Figure 4G**). Color-coding the preferred  
172 orientation of these orientation-selective (OS) neurons, we found a “salt-and-pepper” pattern in their tuning  
173 maps for both CT and CP neurons (**Figure 4C, 4E**), similar to superficial layers of mouse V1<sup>33</sup>. We also  
174 explored the relationship between the tuning maps of the two groups of neurons. We labeled CP and CT  
175 neurons with GCaMP6s and jRGECO1a<sup>34</sup>, respectively, using Cre- and FLPo-recombinase strategies  
176 (**Supplementary Figure 3A, 3B**), and performed calcium imaging on them simultaneously. OS tests did  
177 not reveal obvious relationship between the tuning maps of CPs and CTs (**Supplementary Figure 3C-3E**).

178 Comparing CP and CT neurons with visually evoked responses, we found a smaller proportion of CP  
179 neurons to have orientation selectivity: whereas a remarkably high percentage (97%) of CT neurons were  
180 OS (out of 796 CT cells from 10 mice), 71% of CPs were OS (out of 483 CP cells from 17 mice) (**Figure**  
181 **4H**). The same trend held for individual mice, with a significantly higher fraction of OS CT neurons than  
182 CP neurons (CT:  $0.97 \pm 0.03$ , CP:  $0.71 \pm 0.22$ ; median  $\pm$  IQR; 10 CT and 17 CP mice; rank-sum tests,  $p <$   
183  $0.001$ ; **Figure 4I**).

184 We quantified orientation selectivity of each cell with orientation-selectivity index (OSI) and global  
185 OSI index (gOSI) (see Methods, **Figure 4J, 4K**). Both OSI and gOSI distributions of OS CT neurons had  
186 significantly greater medians than those of CP neurons (CT gOSI: 0.74, OSI: 0.97, 772 neurons from 10  
187 mice; CP gOSI: 0.54, OSI: 0.84, 343 neurons from 17 mice; rank-sum tests,  $p < 0.001$  in both cases). As  
188 indicated by the OSI distributions and consistent with the distributions of the full width at half maximum  
189 (FWHM) of the tuning curves (**Figure 4L**), both CT and CP populations contained highly orientation-  
190 selective and sharply tuned neurons, with their preferred orientations distributed over the entire orientation  
191 range (**Figure 4M**). However, we found more broadly tuned CP neurons (FWHM around  $100^\circ$ , e.g., ROI i  
192 in **Figure 4G**), which were absent from CT population.

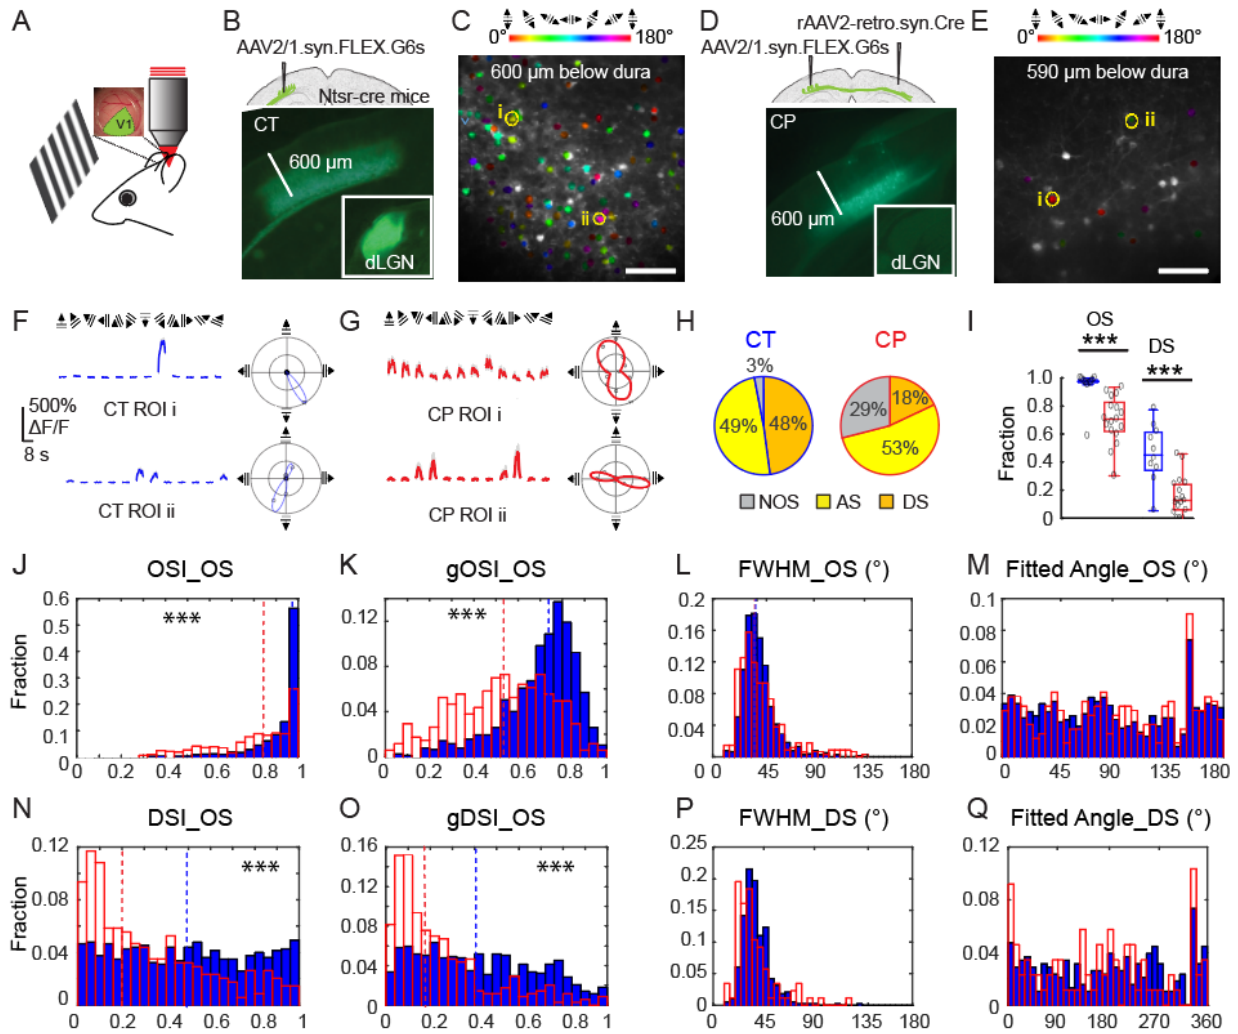

**Figure 4. *In vivo* calcium imaging of L6 CT and CP neurons in V1 of the awake mouse**

(A) Schematic of *in vivo* imaging and visual stimulation setup.

(B, D) Viral labeling strategies and widefield fluorescence images of coronal sections containing GCaMP6s<sup>+</sup> L6 CT and CP neurons, respectively. Insets: dLGN.

(C, E) Example *in vivo* two-photon excitation fluorescence images of L6 CT and CP neurons, respectively, with the orientation-selective (OS) neurons color-coded by their preferred orientation.

(F, G) (Left) Example visually evoked calcium responses from two OS CT and CP neurons (i and ii, labeled in C and E), respectively. Colored lines and gray shades: averages and s.d. from 10 trials; (Right) Polar plots of the responses and fitted turning curve for same neurons.

(H) Percentages of OS, including axis selective (AS) and direction selective (DS), and non-orientation selective (NOS) CT and CP neurons. CT:  $n = 796$  active visually evoked cells, from 10 mice. CP:  $n = 483$  active visually evoked cells, 17 mice.

(I) Fraction of OS and DS cells per mice for CT (blue) and CP (red) neurons.  $n = 10$  mice for CTs;  $n = 17$  mice for CPs. Wilcoxon rank-sum test (nonparametric test): \*\*\* $p < 0.001$ .

(J-Q) Histogram distributions of orientation and direction tuning parameters for CT (blue) and CP (red) neurons, including (J) OSI, (K) gOSI, (L) turning curve FWHMs of OS neurons, (M) preferred orientations of OS neurons, (N, O) DSI and gDSI of

OS neurons, (P) FWHM of DS neurons (P), and (Q) preferred directions for DS neurons. Dashed lines: medians. Wilcoxon rank-sum test: \*\*\* $p < 0.001$ .

Scale bars: 600  $\mu\text{m}$  in (B, D); 100  $\mu\text{m}$  in (C, E).

193 Some OS neurons exhibited substantially different responses towards gratings drifting along opposite  
194 directions. Defining neurons with direction selectivity index  $\text{DSI} > 0.5$  (or a response ratio towards  
195 opposing directions larger than 3, see Methods) as direction-selective (DS), we found about half of the CT  
196 neurons to be DS, whereas only a quarter of the orientation-selective CP neurons were DS (**Figure 4H, 4I**).  
197 Consistent with this result, DSI and gDSI distributions of OS CP cells had smaller medians than the CT  
198 cells (DSI CP: 0.25, CT: 0.49; gDSI CP: 0.17, CT: 0.40; 343 CP neurons from 17 mice, 772 CT neurons  
199 from 10 mice; rank-sum tests,  $p < 0.001$  in both cases; **Figure 4N, 4O**). The FWHMs of DS neurons had  
200 similar distributions to those of the OS neurons (**Figure 4P**), and their preferred motion directions were  
201 distributed throughout the whole range of angles (**Figure 4Q**).

202 Using sparse-noise stimuli consisting of a pair of white and black squares randomly distributed on a  
203 gray background, we also mapped the visual receptive fields of the CT and CP neurons in anesthetized  
204 mice, using our previously published method<sup>31</sup>. Cells with defined receptive fields were found in both  
205 groups (**Supplementary Figure 4**). For CT neurons, out of 45 cells ( $n = 3$  mice) that showed visually  
206 evoked activity, we found well-defined RFs for 27 cells (i.e., 60%); For CP neurons, out of 71 cells ( $n = 5$   
207 mice) that had visually evoked activity, 21 cells were found to have RFs (i.e., 30%).

208 The existence of L6 CP neurons with visually evoked activity, selectivity towards visual features, and  
209 well-defined receptive fields, as revealed by the calcium imaging experiments, suggested that L6 CP  
210 neurons in the monocular V1 encode and transmit orientation, direction, as well as receptive field  
211 information across the corpus callosum to contralateral cortex. A distinct population from the thalamus-  
212 projecting CT neurons, CP neurons nevertheless possess similar orientation tuning characteristics and thus  
213 serve as a pathway of visual information flow between V1s of the two hemispheres.

214

215

216

217

218 **CP neurons exhibit diverse patterns of spontaneous activity both in the dark and during drifting**  
219 **grating stimuli**

220 While investigating the orientation selectivity of L6 neurons with drifting gratings, we discovered that the  
221 calcium transients of 74% of active CP neurons (1393/1876 CP cells in 17 mice) were not synchronized  
222 with stimulus presentation, thus appeared to be spontaneously active. In comparison, a much smaller  
223 fraction of active CT neurons (38%, 486/1282 CT cells in 10 mice) exhibited such non-visually evoked  
224 activity (**Figure 5A**). Keeping the animal in the dark, we found that 83% of CP neurons (1351/1625 neurons  
225 from 11 mice) were spontaneously active, a higher proportion than that of CT neurons (48%, 173/359  
226 neurons from 5 mice) (**Figure 5B**). Furthermore, in the dark, the calcium transients of CP neurons have  
227 higher amplitudes than CT neurons (mean  $\Delta F/F\%$  during the entire imaging session, median values: CP  
228 14.7, 1351 neurons from 11 mice; CT 6.6, 173 neurons from 5 mice,  $p < 0.001$ , Wilcoxon rank sum test;  
229 **Figure 5C**).

230 Next we imaged the same neurons with the mice first kept in the dark and then presented with drifting  
231 grating stimuli. We identified CP and CT neurons that did not have visually evoked activity but only were  
232 spontaneously active both in the dark and during grating stimuli for further analysis (1224 CP neurons, 135  
233 CT neurons, **Figure 5D-F**). Similar to above (**Figure 5C**), the spontaneous activity of CP neurons in the  
234 dark and during grating stimulus presentation had larger transients than the CT population (mean  $\Delta F/F\%$ ,  
235 median values in the dark: CP 10.4 vs CT 3.6,  $p < 0.001$ ; median values during grating: CP: 14.8 vs CT:  
236 7.4,  $p < 0.001$ , Wilcoxon rank sum test; **Figure 5E**). Interestingly, even though these neurons did not exhibit  
237 visually evoked activity, the spontaneous calcium transients of a large proportion of CP neurons (68%)  
238 were strongly modulated by the presence of grating stimuli (**Figure 5D**): these CP neurons either increased  
239 (29%) or decreased (40%) their mean  $\Delta F/F$  by at least 2-fold when the animal transitioned from being in  
240 the dark to being presented with grating stimuli. Although similar percentage (66%) of CT neurons had a  
241  $\geq 2\times$  change of their spontaneous activity level during the transition from dark to grating sessions, more of  
242 them exhibited increasing mean  $\Delta F/F\%$  when grating stimuli were presented (51% with  $\geq 2\times$  activity gain  
243 vs. 15% with  $\geq 2\times$  with activity reduction, **Figure 5F**). By definition, such spontaneous activity was not  
244 directly evoked by visual stimuli. The observed modulations by the stimulation condition, however, suggest  
245 that they may reflect changes in the internal states that resulted from changes of the animal's sensory  
246 perception.

247 We also found prominent differences in spontaneous activity of CP and CT neurons that showed  
248 visually evoked activity to grating stimuli (**Figure 5G**). CT neurons exhibiting visually-evoked responses  
249 had little spontaneous activity in the dark. In contrast, both OS and NOS CP neurons had much stronger  
250 spontaneous calcium transients in the dark (mean  $\Delta F/F\%$ , OS neurons: CP 7.1, 284 cells from 11 mice, CT

251 2.9, 218 cells from 5 mice,  $p < 0.001$ ; NOS neurons: CP 10.4, 117 cells from 11 mice, CT 0.7, 6 cells from  
 252 5 mice,  $p < 0.01$ ; Wilcoxon rank sum test, **Figure 5H**), indicating pervasive spontaneous activity as a  
 253 distinct feature of L6 CP neurons. Together with the CP neurons that encoded visual information, through  
 254 the cross-callosal horizontal network observed in our anatomical experiments, CP neurons thus convey both  
 255 visual and non-visual information to multiple cortical regions across two hemispheres.

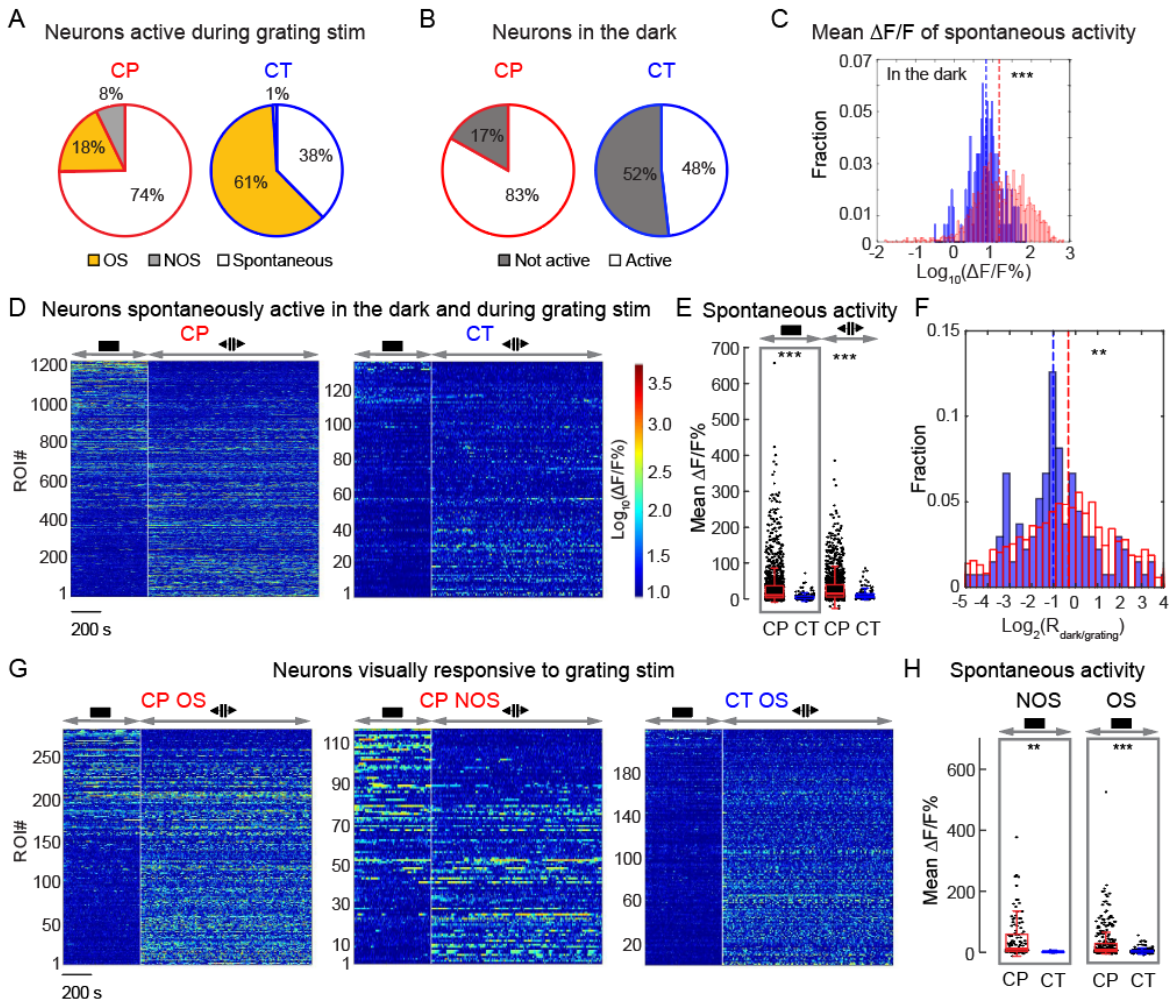

**Figure 5 V1 L6 CP neurons exhibit pervasive spontaneous activity both in the dark and under visual stimulation**

(A) Percentages of active CP and CT neurons with non-visually evoked, visually-evoked OS, and visually-evoked NOS responses, respectively, during drifting grating stimuli. CT: 1282 neurons from 10 mice; CP: 1876 neurons from 17 mice. Active neurons if its 99%  $\Delta F/F$  value is larger than 50%; Visually evoked neurons if its activity during at least one visual stimulus was significantly higher than its activity during the inter-stimulus period by ANOVA test ( $p < 0.01$ ).

(B) Percentages of spontaneously active GCaMP6<sup>+</sup> neurons in the dark. CT: 359 neurons from 5 mice; CP: 1625 neurons from 11 mice.

(C) Histogram distributions of the mean  $\Delta F/F\%$  from the spontaneously active CP (red) and CT (blue) neurons in the dark. CT: 173 neurons from 5 mice; CP: 1351 neurons from 11 mice.

(D) Raster plots of calcium transients associated with non-visually-evoked spontaneous activity of CP and CT neurons in the dark and under immediate subsequent drifting grating stimulation.  $\Delta F/F\%$  in log10 scale. Neurons were sorted according to the ratio of averaged  $\Delta F/Fs$  in the dark and under drifting grating stimulation. CP: 1224 from 11 mice; CT: 135 neurons from 5 mice.

(E) Scattered plots of the mean  $\Delta F/F\%$  for neurons in (D).

(F) Histogram distributions of the ratios of mean  $\Delta F/F\%$  in the dark and under grating stimuli ( $R_{\text{dark/grating}}$  in log2 scale) for the CP (red) and CT (blue) neurons in (D).

(G) Raster plots of calcium transients ( $\Delta F/F\%$  in log10 scale) and (H) mean  $\Delta F/F\%$  associated with spontaneous activity in the dark for CP (red) and CT (blue) neurons with visually evoked activity. CP: 284 OS and 117 NOS neurons from 11 mice; CT: 218 OS and 6 NOS neurons from 5 mice. Wilcoxon rank sum test: \*\*\* $p < 0.001$  and \*\* $p < 0.01$ .

256

257

## 258 Activity correlation of CP and CT neurons with arousal level

259 Having discovered that L6 neurons exhibit strong spontaneous activity, we further investigated how their  
260 activity was correlated with the arousal level of the animal. Given that pupil diameter is a well-established  
261 measure of arousal level, with enlarged pupil correlating with heightened alertness<sup>35</sup>, we combined  
262 simultaneous pupillometry recording with two-photon *in vivo* imaging of L6 neurons in the awake mouse  
263 (**Figure 6A**), where the mouse was first kept in the dark and then presented with drifting grating stimuli  
264 (**Figure 6B**).

265 We first studied how pupil diameter was correlated with spontaneous activity in the dark (**Figure 6C-**  
266 **F**). At the population level, we calculated the Pearson correlation coefficients between pupil diameter and  
267 the summed  $\Delta F/F$  of all active CT or CP cells in the same FOV within individual imaging sessions (Example  
268 FOVs in **Figure 6C** and **6D**). We found that, in the dark, the population activity of CT neurons in each  
269 FOV was consistently positively correlated with pupil diameter. In contrast, the population activity of CP  
270 neurons displayed a wide variation in their correlation with pupil diameter, with imaging sessions where  
271 the FOV activity exhibited positive, negative, or a lack of correlation with arousal. As a result, CP neuron  
272 FOVs had significantly lower correlation coefficients than CT (median of correlation coefficients: 0.44 for  
273 CT vs 0.07 for CP, 10 FOVs from 5 CT mice, 16 FOVs from 5 CP mice,  $p < 0.001$ , Mann-Whitney U test,  
274 **Figure 6E**). We observed the same trend on single-cell level and found the spontaneous activity of  
275 individual CT neurons to be more likely to exhibit positive correlation with arousal than CP neurons

276 (medians: 0.25 for CT vs 0.08 for CP, 384 CT neurons from 5 mice and 456 CP neurons from 5 mice,  $p <$   
277 0.001, Mann-Whitney U test, **Figure 6F**).

278 We then measured CT and CP neuronal activity during grating stimulation (**Figure 6G-K**, example  
279 FOVs in **Figure 6G** and **6H**). Because CT and CP neurons may exhibit either visually evoked or  
280 spontaneous activity during grating stimulation, we divided neurons into two populations based on whether  
281 they showed visually evoked activity and separately studied their activity correlation with arousal. For  
282 neurons with visually evoked activity, on both population and single-cell levels (**Figure 6I** and **6J**), CP  
283 neurons were more likely to be positively correlated with arousal, whereas CT neurons' correlation with  
284 arousal averaged around zero (**Figure 6I**, median correlation coefficients of visually evoked activity at  
285 FOV level: 0.18 for CP vs -0.001 for CT, 16 FOV from 5 mice for CP, 8 FOVs from 5 mice for CT,  $p <$   
286 0.05; **Figure 6J**, median correlation coefficients of visually evoked activity at single cell level: 0.08 for CP  
287 vs 0.009 for CT,  $n = 136$  for CP from 5 mice,  $n = 215$  from CT from 5 mice,  $p < 0.001$ ; Mann-Whitney U  
288 test). For spontaneous activity during grating stimulation, although on single-cell level there was a  
289 significantly higher fraction of CP neurons showing positive correlation with arousal than CT (**Figure 6K**,  
290 median correlation coefficients for spontaneous activity: 0.09 for CP vs 0.05 for CT,  $n = 320$  for CP from  
291 5 mice,  $n = 169$  from CT from 5 mice,  $p < 0.01$ , Mann-Whitney U test), on the population FOV level,  
292 difference between CT and CP was not significant (left panel of **Figure 6L**, median correlation coefficients:  
293 0.21 for CP vs 0.09 for CT, 16 FOV from 5 mice for CP, 8 FOVs from 5 mice for CT,  $p = 0.14$ , Mann-  
294 Whitney U test).

295 Comparing with the spontaneous activity of the same neurons in the dark (right panel of **Figure 6L**,  
296 FOV comparison, median correlation coefficients of CPs: 0.086 in dark vs 0.21 during grating,  $p < 0.05$ ;  
297 for CTs: 0.39 in dark vs 0.09 during grating,  $p < 0.01$ ; 16 FOV from 5 mice for CP, 8 FOVs from 5 mice  
298 for CT, Wilcoxon signed-rank test; **Figure 6M**, single-cell comparisons, median correlation coefficients of  
299 CPs: 0.078 in dark vs 0.094 during grating,  $p < 0.01$ ; for CTs: 0.25 in dark vs 0.046 during grating,  $p <$   
300 0.001; 320 CP neurons from 5 mice and 169 CT neurons from 5 mice, Wilcoxon signed-rank test), we  
301 found intriguing differences between CT and CP neurons. For spontaneous activity of CT population, its  
302 correlation with arousal substantially decreased when the mouse transitioned from being in the dark to being  
303 under grating stimulation. For CP neurons, however, its spontaneous activity correlation with arousal  
304 followed the opposite trend and went from being highly heterogeneous with both negative and positive  
305 correlation to being mostly positive correlation. Together, our investigations on the spontaneous activity  
306 characteristics of L6 neurons indicated that CP neurons possessed pervasive spontaneous activity during  
307 both the absence and the presence of strong visual input, with activity patterns and correlation with arousal

308 distinct from those of CT neurons. Together with the anatomical results presented earlier, they point to new  
 309 and yet-to-explored functions of these cross-callosal neurons.

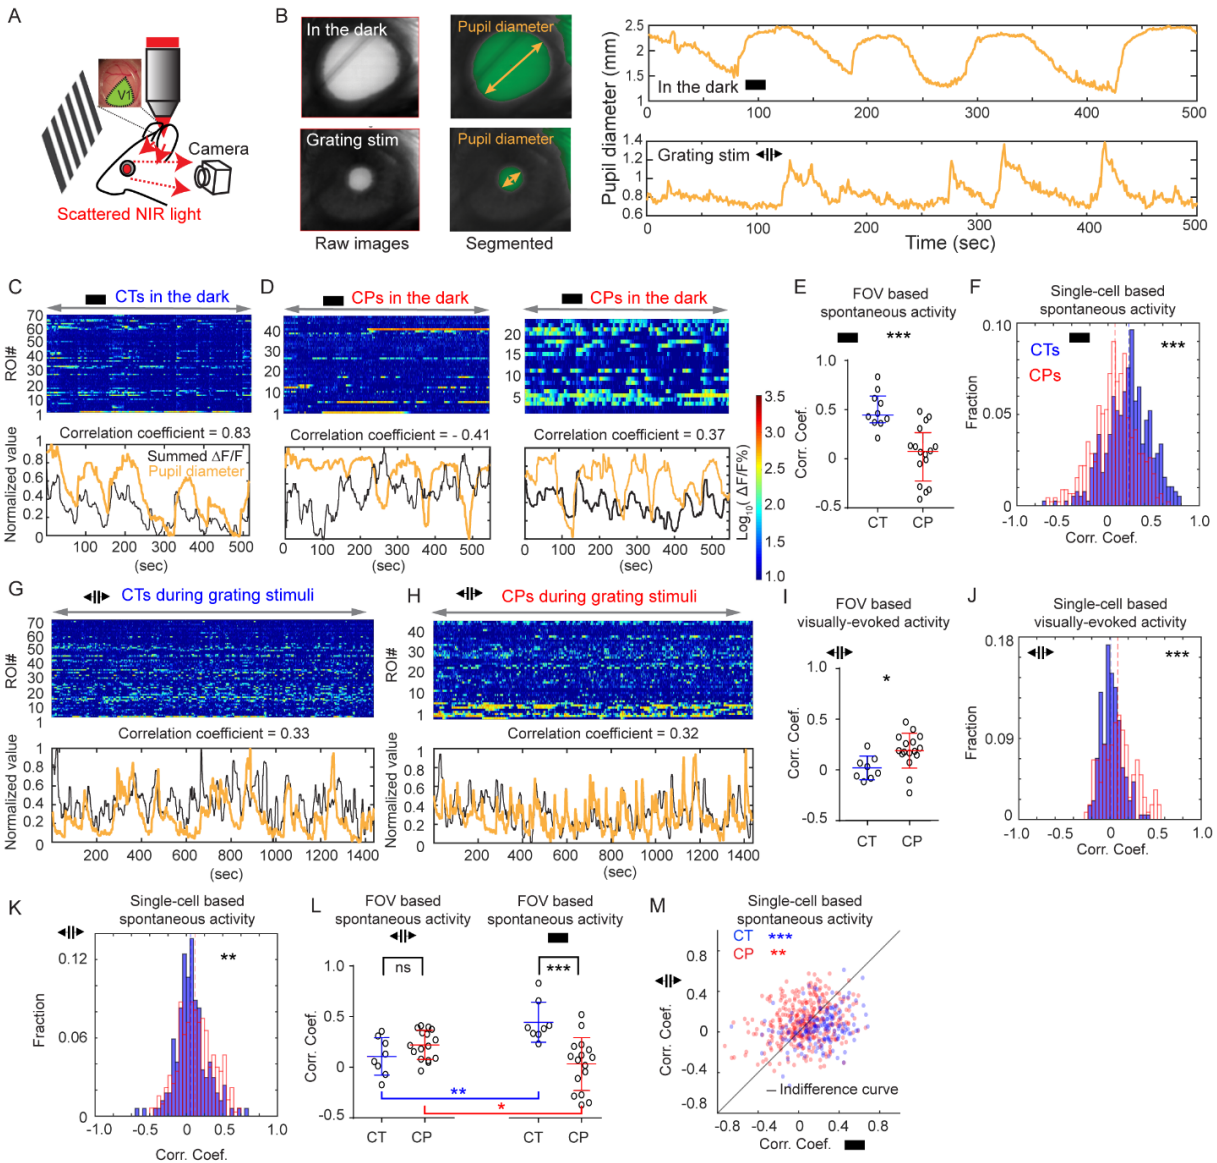

**Figure 6. Activity of L6 CP and CT neurons shows distinct patterns of correlation with arousal level**

(A) Arousal level was evaluated by pupillometry, where pupil was imaged using the near IR (NIR) two-photon excitation light scattered through the brain and emitted from the eye simultaneously with *in vivo* calcium imaging.

(B) Example pupillometry results showing the pupil in the dark (upper panels) and during grating stimuli (lower panels). From left to right: raw image, segmented image, and temporal dynamics of pupil diameter.

(C, D) Upper panels: Spontaneous  $\text{Ca}^{2+}$  response ( $\Delta\text{F}/\text{F} \%$ ) of all active CT and CP cells in (C) one (for CT) and (D) two (for CP) example FOVs with the animals in the dark. Lower panels: Normalized pupil diameter (orange) and summed  $\Delta\text{F}/\text{F}$  of all neurons in the FOV (black). Correlation coefficients were calculated between pupil diameter and summed  $\Delta\text{F}/\text{F}$ .



(E) FOV-based comparison of correlation coefficients between pupil diameter and summed spontaneous activity of each FOV of CT (10 FOVs from 5 mice) and CP (16 FOVs from 5 mice) neurons in the dark.  $p < 0.001$ , Mann-Whitney U test.

(F) Histogram distribution comparison of correlation coefficients between pupil diameter and spontaneous activity of individual CT and CP cells (384 CT neurons from 5 mice and 456 CP neurons from 5 mice) in the dark.  $p < 0.001$ , Mann-Whitney U test.

(G, H) Upper panels:  $\text{Ca}^{2+}$  response ( $\Delta\text{F}/\text{F} \%$ ) of all active cells (including visually evoked and spontaneous activity) in example (G) CT and (H) CP FOVs with the animals under grating stimulation. Lower panels: Normalized pupil diameter (orange) and summed  $\Delta\text{F}/\text{F}$  of all neurons in the FOV (black). Correlation coefficients were calculated between pupil diameter and summed  $\Delta\text{F}/\text{F}$ .

(I) FOV-based comparison of correlation coefficients between pupil diameter and summed visually evoked activity of each FOV of CT (8 FOVs from 5 mice) and CP (16 FOVs from 5 mice) neurons during grating stimulation of the animal.  $p < 0.01$ , Mann-Whitney U test.

(J) Histogram distribution comparison of correlation coefficients between pupil diameter and visually evoked activity of visually-evoked cells during the grating stimulation (215 CT neurons from 5 mice and 136 CP neurons from 5 mice),  $p < 0.001$ , Mann-Whitney U test.

(K) Histogram distribution comparison of correlation coefficients between pupil diameter and spontaneous activity of non-visually-evoked cells during the grating stimulation (169 CT neurons from 5 mice and 320 CP neurons from 5 mice).  $p < 0.01$ , Mann-Whitney U test.

(L) FOV-based comparison of correlation coefficients between pupil diameter and summed spontaneous activity of each FOV of CT (8 FOVs from 5 mice) and CP (16 FOVs from 5 mice) neurons (left panel) during grating stimulation and (right panel) in the dark. \*\*\* $p < 0.001$ , \*\* $p < 0.01$ , \* $p < 0.05$ , ns  $p > 0.05$ , Mann-Whitney U test for CT and CP comparison under the same stimulus condition, Wilcoxon signed-rank test for comparing the same CT or CP FOVs under two stimulus conditions.

(M) Single-cell based comparison of correlation coefficients between pupil diameter and spontaneous activity (y-axis) during grating stimulation or (x-axis) in the dark of CT (in blue) or CP (in red) neurons that were spontaneous active in the dark and during grating stimulation (169 CT neurons from 5 mice and 320 CP neurons from 5 mice). \*\*\*  $p < 0.001$ , \*\*  $p < 0.01$ , Wilcoxon signed-rank test.

310

311

312

313

314

315

316

317

318

## 319 Discussion

320 Despite a growing recognition of the prominent roles that the corpus callosum plays in the processing of  
321 sensory information, the identity and property of CP neurons are not well understood. Traditionally  
322 considered to be L2/3 or L5 neurons projecting homotopically to the contralateral cortex, CP neurons were  
323 thought to contribute to the processing of sensory information encoding bilateral stimuli. In this work, using  
324 a designer variants of recombinant adeno-associated virus, rAAV2-retro, we gained selective genetic access  
325 to CP neurons projecting to mouse V1 and investigated their connectivity pattern and functional properties.

326 We found that in contrast to L2/3 and L5 CP neurons at V1/V2 border (corresponding to the binocular  
327 visual field) that contribute to binocularity, within monocular V1, the main CP neurons mediating cross-  
328 callosal communication were a population of L6 neurons that were distinct from the more well-known  
329 thalamus-projecting L6 CT neurons. Immunostaining with GABA confirmed the excitatory nature of the  
330 CP neurons, consistent with previous studies in cat and rat<sup>36</sup>. Although we found the ratio of CP to CT  
331 neurons to be one to nine, the proportion of CP neurons was almost certainly underestimated due to  
332 incomplete retrograde labeling. In the context of L6 neurons in general, the CP L6 neurons identified here  
333 belong to the corticocortical (CC) population that provide only corticocortical but not corticothalamic  
334 projections. In the rat primary somatosensory cortex, an equal proportion of CT and CC neurons were  
335 found, implicating L6 as a substantial contributor of corticocortical projections<sup>25</sup>. Our results further  
336 indicate that the CP subpopulation of the L6 CC neurons subserve cross-callosal communications for  
337 monocular V1.

338 Contralateral V1 is not the only source of cross-callosal inputs to V1. We found that L6 CP neurons  
339 from the secondary visual cortices and L5 CP neurons from primary auditory cortex projected across corpus  
340 callosum into V1. Using the same viral strategy, we also discovered that V1 L6 CP neurons projected back  
341 to these sensory areas. Therefore, these cross-callosal projections are not homotopic but spanning multiple  
342 cortical regions. We found the main cross-callosal axonal projections to localize in the infragranular layers  
343 of V1 and that these projections formed monosynaptic connection with the ipsilateral CP neurons,  
344 indicating direct reciprocal connectivity between CP neurons of the two hemispheres. Together, our results  
345 revealed the existence of an extensive cross-callosal reciprocal network mediated by L6 neurons in the  
346 visual cortical areas. The involvement of higher visual cortices in this pathway suggests the presence of  
347 higher-level visual representations, which may provide contextual information to early processing of visual  
348 information in V1. The inclusion of AuC within this reciprocal network leads us to speculate that this  
349 network is also involved in cross-modal interactions across the hemispheres<sup>37</sup>. Indeed, a recent work  
350 reported that visual stimuli can directly evoke activity of L6 neurons in auditory cortex<sup>38</sup>, which can be  
351 partly attributed to the cross-callosal inputs from L6 CP neurons in visual cortices. Similarly, by conveying

352 auditory information from the contralateral hemisphere, the transcallosal network described here can also  
353 contribute to the contextual modulation of V1 by auditory signals<sup>39,40</sup>.

354 The retrogradely transported rAAV2-retro also allowed us to express genetically encoded calcium  
355 indicators in V1 CP neurons and study their visually evoked as well as spontaneous activity in awake mice  
356 *in vivo*. With drifting grating stimuli, we found both CP and CT neurons with visually evoked responses  
357 with some subtle but significant differences in their response properties: whereas almost all visually-driven  
358 CT neurons were OS, about 70% of CP neurons were; CT neurons were more direction selective than CP  
359 neurons; the fraction of visually responsive CT neurons that had well-defined receptive fields was also  
360 about double that of the CP neurons (60% vs. 30%); both populations included sharply orientation-tuned  
361 cells, although CP also included more broadly tuned neurons. Despite these differences, our experiments  
362 indicate that, by encoding visual features such as orientation, direction, and receptive field, L6 CP neurons  
363 convey information on the monocular visual field across corpus callosum into the contralateral hemisphere.

364 More distinct are the spontaneous activity patterns of CP and CT neurons. Investigating how their  
365 activity related to arousal level, we found that in the dark, spontaneous population activity of *NTSR1*-  
366 positive CT neurons was strongly positively correlated with the arousal level of the mouse. Given that these  
367 *NTSR1*-positive CT neurons are known to be directly depolarized and potently modulated by  
368 acetylcholine<sup>41</sup>, in the absence of visual inputs the spontaneous activity that we observed in the dark was  
369 likely strongly modulated and/or driven by the cholinergic inputs into V1. Upon drifting grating stimulation,  
370 CT population activity correlation with arousal became significantly less than in the dark, possibly because  
371 the strong visual inputs that they received from local V1 neurons reduced the influence of and thus the  
372 correlation with cholinergic activity. Together with recent results where CT neurons were found to control  
373 the gain of local visually evoked cortical activity<sup>22</sup>, our observation also suggests a functional pathway for  
374 arousal level to modulate V1 activity.

375 Compared with CT neurons, the activity patterns for CP population were more dominated by  
376 spontaneous activity. Both during drifting grating stimuli and with the mice kept in the dark, CP neurons  
377 were much more likely than CT neurons to exhibit spontaneous activity (74% vs. 38% during grating  
378 stimuli, 83% vs. 48% in the dark) with larger calcium transient magnitudes. The heightened spontaneous  
379 activity of CP population may be explained by its presynaptic input pattern. Whereas CT and CP  
380 populations both receive local V1 inputs, we found CP neurons to receive more long-range inputs from  
381 higher cortical areas of the ipsilateral hemisphere, which are likely feedback in nature and known to target  
382 deeper layers<sup>42,43,44</sup>. They also received cross-callosal cortical inputs via the extensive CP neuron network  
383 described above. Given the beliefs that spontaneous activity is primarily driven by corticocortical  
384 connections<sup>45,46,47</sup> and projections from higher cortical regions initiate spontaneous patterns in deep layers

385 of primary sensory cortex<sup>48</sup>, these additional sources of cortical inputs for CP neurons may account for their  
386 heightened spontaneous firing.

387 These long-range cortical inputs may also cause CP neurons to have more diverse activity correlations  
388 with brain states. Unlike CT neurons, whose spontaneous population activity in the dark was strongly  
389 positively correlated with arousal, the spontaneous activity of the CP population in the dark may be  
390 negatively, positively, or un-correlated with the arousal level, indicating more complex (e.g., multisensory,  
391 higher cognitive) origins of forces that drive and modulate their spontaneous firing<sup>49</sup>. During grating  
392 stimuli, the population activity of CP neurons becomes more positively correlated with arousal than in the  
393 dark, suggesting a switch of cortical dynamics and brain state when the animal was exposed to strong  
394 sensory stimulation.

395 For CT and CP neurons with spontaneous activity both in the dark and during grating stimuli, we found  
396 that their activity, albeit not temporally synchronized with stimulus onsets and thus not directly visually  
397 evoked, was modulated by the presence of the grating stimuli. These parallel the observations made in alert  
398 macaque V1, where L6 were found to be the dominant spontaneously active layer both in the dark and in  
399 the light, with the change of illumination condition modulating their firing rates<sup>50, 51, 52</sup>. Such changes of  
400 spontaneous firing rate may encode the presence, timing, or luminance of a stimulus, as well as reflect the  
401 associated shifts of the animal's cortical and behavioral states.

402 Previous studies indicated that spontaneous events often originate from infragranular layers then spread  
403 upwards into superficial layers<sup>48, 53</sup>. In addition to leading to spontaneous activity in local V1 circuit and  
404 ipsilateral cortical regions, CP neurons also convey information to contralateral hemisphere through the  
405 corpus callosum, thus can influence cortical dynamics more globally. The exact functional roles of the  
406 spontaneous activity observed by us are unknown. Nevertheless, with their visually driven as well as  
407 spontaneous activity and given their extensive reciprocal network spanning multiple cortical areas in two  
408 hemispheres, L6 CP neurons are the ideal candidates in broadcasting both visual and nonvisual information  
409 globally, thus regulating and coordinating brain-wide activity events from sensory perception to memory  
410 replay<sup>54, 55, 56</sup>.

## 411 **Methods**

412 All experimental protocols were conducted according to the National Institutes of Health guidelines for  
413 animal research and approved by the Institutional Animal Care and Use Committee at Janelia Research  
414 Campus, Howard Hughes Medical Institute.

### 416 **Experimental Model and Subject Details**

417 The following mouse lines were used: Wild-type C57BL/6J (Jackson Laboratory); NTSR1-Cre (strain  
418 B6.FVB(Cg)-Tg(NTSR1-cre)GN220Gsat/Mmcd, stock number 030648-UCD); Scnn1a-Tg3-Cre mice (Jax  
419 no. 009613); Rbp4-Cre mice (MMRRC no. 031125-UCD); Gad2-IRES-Cre (Jax no. 010802); tdTomato  
420 reporter line (Ai14, Jax. 007908); nuclear tdTomato reporter line (R26 LSL H2B mCherry 1H3 line, Jax  
421 no. 023139); Ai3 mice (JAX Stock No: 007903). Mice of both sexes (older than P60) were used. Sample  
422 sizes (number of mice, cells and/or field-of-view, FOVs) for each experiment are stated in main text. AAV  
423 viruses were obtained from Virus Services of Janelia Research Campus, HHMI.

### 425 **Virus injection for histology**

426 Virus injection and cranial window implantation procedures have been described previously<sup>57</sup>. Briefly,  
427 mice were anaesthetized with isoflurane (1–2% by volume in O<sub>2</sub>) and given the analgesic buprenorphine  
428 (SC, 0.3 mg per kg of body weight). Virus injection was performed using a glass pipette (Drummond  
429 Scientific Company) beveled at 30° with a 15 to 20-µm opening and back-filled with mineral oil. A fitted  
430 plunger controlled by a hydraulic manipulator (Narashige, MO10) was inserted into the pipette and used to  
431 load and inject the viral solution.

432 For the injection of virus for histological examination, a burr hole was made (~200 µm diameter) over  
433 the injection site. 30 nl virus-containing solution (rAAV2-retro.CAG.GFP, 1×10<sup>13</sup> infectious units per ml)  
434 was injected 0.6 mm below pia at two injection sites for each brain region. The injection coordinates for  
435 each brain region are: (i). V1: midline: 2.5 mm, Bregma: -3.4 mm and -4.0 mm; (ii). V2M: midline: 1.25  
436 mm, Bregma: -3.4 mm and -4.0 mm; (iii). V2L: midline 3.5 mm, Bregma: -3.4 mm and -4.0 mm; (iv).  
437 Auditory cortex: midline 4.0 mm, Bregma: -3.4 mm and -4.0 mm.

438 For rabies tracing experiment, 1:1 mixture of AAV2/1.CAG.FLEX.BFP.T2A.TVA (5×10<sup>13</sup> infectious  
439 units per ml) and AAV2/1.CAG.FLEX.BFP.T2A.G (7.2×10<sup>12</sup> infectious units per ml) were injected into  
440 left V1 at the coordinates described above (30 nl at 0.6 mm below pia). For the labeling of CP neurons,  
441 rAAV2-retro.syn.Cre (1×10<sup>13</sup> infectious units per ml) was first injected into right V1 at the same  
442 coordinates, before rabies vectors were injected. Three weeks later, ΔRV.mCherry (3.4×10<sup>8</sup> infectious units  
443 per ml) was injected into the same injection sites in left V1 (30 nl, 0.6 mm below pia).

444

#### 445 **Viral injection and cranial window implantation for *in vivo* imaging**

446 For the labeling of CT and CP cells for calcium imaging, a 3.5-mm diameter craniotomy was first made  
447 over left V1 of NTSR1-Cre and wildtype mice, respectively. Then 30 nl of virus-containing solution  
448 (AAV2/1.syn.FLEX.GCaMP6s,  $1 \times 10^{13}$  infectious units per ml) was injected 0.6 mm below pia into left  
449 V1 at four injection sites at the intersection points of the two left-right lines at Bregma -3.4 mm and -4.0  
450 mm, and two anterior-posterior lines at 2.2 mm and 2.6 mm from the midline. For the labeling of CP  
451 neurons, rAAV2-retro.syn.Cre ( $1 \times 10^{13}$  infectious units per ml) was first injected into the contralateral V1  
452 at the same coordinates, before craniotomy was performed. For dual-color imaging experiments, a 1:1  
453 mixture of AAV2/1.CAG.FLEX.jRGECO1a and AAV2/1.CAG.FRT.GCaMP6s was injected into left V1  
454 of NTSR1-Cre mice, and rAAV2-retro.syn.FLPo was injected into the right V1 of the same animal. After  
455 the pipette was pulled out of the brain, a glass window made of a single coverslip (Fisher Scientific, no.  
456 1.5) was embedded in the craniotomy and sealed in place with dental acrylic. A titanium headpost was then  
457 attached to the skull with cyanoacrylate glue and dental acrylic.

458

#### 459 **Visual stimulation**

460 Visual stimuli were presented by back projection on a screen made of Teflon film using a custom-modified  
461 DLP projector. The screen was positioned 17 cm from the right eye, covering  $75^\circ \times 75^\circ$  degrees of visual  
462 space and oriented at  $\sim 40^\circ$  to the long body axis of the animal. The projector provided equilength and linear  
463 frames at 360 Hz (designed by A. Leonardo, Janelia Research Campus, and Lightspeed Design, model  
464 WXGA-360). Its lamp housing was replaced by a holder for liquid light guide, through which visible light  
465 (450–495 nm) generated by a LED light source (SugarCUBE) was delivered to a screen made of  
466 polytetrafluoroethylene. The maximal luminance measured at the location of animal eyes was  $437 \text{ nW/mm}^2$ .  
467 Visual stimuli were generated using custom-written codes. During visual stimulation, the luminance level  
468 was kept constant. To measure orientation-tuning, full-field square gratings were presented in 12 directions  
469 in a pseudorandom sequence for 12 s each, during which time each stimulus was static for the first and last  
470 3 s and moving during the middle 6 s. Gratings had 100% contrast, 0.07 cycles per degree, and drifted at  
471 26 degrees per second (i.e., a temporal frequency of  $\sim 2$  Hz). Each oriented grating was presented for a total  
472 of ten trials.

473

#### 474 **Pupil tracking**

475 An infrared-sensitive CCD camera controlled by a custom written interface with LabVIEW® collected  
476 images of the pupil illuminated by two-photon excitation light scattered into the eye during brain imaging  
477 (Figure 7A) at 10-Hz frame rate. The pupil was segmented by custom-written MATLAB codes and pupil  
478 diameter values interpolated to find the diameter of the pupil corresponding to each two-photon image.

## 479 **Two-photon imaging**

480 All imaging experiments were carried out on head-fixed, awake mice, except data in Figure S4, for which  
481 mice were anesthetized for receptive field mapping. To habituate the mice to experimental handling, each  
482 mouse was head-fixed onto the sample stage with its body restrained under a half-cylindrical cover, which  
483 reduced struggling and prevented substantial body movements such as running. The habituation procedure  
484 was started one week after surgery, repeated 3–4 times for each animal, and each time for 15–60 min.  
485 Imaging was performed with two-photon fluorescence microscope 3–4 weeks after virus injection. Each  
486 experimental session lasted 45 minutes to 2 hours. Multiple sections (imaging planes) may be imaged within  
487 the same mouse. GCaMP6s was excited at 940 nm with a femtosecond laser (InSight Deepsee, Spectra-  
488 Physics) that was focused by either a Nikon 16×, 0.8 NA or an Olympus 25×, 1.05 NA objective. Emitted  
489 fluorescence photons reflected off a dichroic long-pass beamsplitter (FF665-Di02-25×36; Semrock) and  
490 were detected by a photomultiplier tube (H7422PA-40, Hamamatsu). jRGECO was excited at 1100 nm  
491 with the same laser source. For simultaneous imaging of GCaMP6s and jRGECO, 1030 nm was used for  
492 excitation.

493 Images of CP or CT neurons were acquired from 550 to 650  $\mu\text{m}$  below pia. Laser power measured post  
494 objective varied between 67 mW and 329 mW ( $n = 38$  imaging sessions from 17 mice). Typical time for  
495 mapping the orientation selectivity of a single image section was  $\sim 25$  min, during which no photobleaching  
496 or photodamage was observed. Typical images had  $256 \times 256$  pixels, at 1.2–2.2  $\mu\text{m}$  per pixel and 2-3 Hz  
497 frame rate.

498

## 499 **Histology**

500 The survival time before histological evaluation for mice injected with tracers (FG) and AAVs was one  
501 week and three weeks, respectively. For mapping of presynaptic neurons, Cre-dependent AAVs encoding  
502 rabies glycoprotein (G) and the avian virus receptor (TVA) were injected into mice with target cells  
503 expressing Cre. Three weeks later, modified rabies virus ( $\Delta\text{RV}$ ) encoding mCherry was injected into the  
504 same mouse, resulting in the targeted infection of the previously labeled neurons, and subsequent trans-  
505 synaptic spread and expression of mCherry. The brain was fixed after 8 days post rabies virus injection.  
506 For histological examination, mice were deeply anaesthetized with isoflurane and transcardially perfused  
507 with PBS and then 4% paraformaldehyde (w/v). Brains were removed and post-fixed overnight in 4%  
508 paraformaldehyde. Fixed whole brains were embedded in 4% agar and sliced with vibrating microtome  
509 (V1200S, Leica) at the thickness of 100  $\mu\text{m}$  for direct observation or 40  $\mu\text{m}$  for immunostaining. We  
510 performed immunostaining by application of primary antibodies (overnight): chicken-anti-GFP (Aves,  
511 1:200) for GCaMP6s, or anti-GABA (Abcam, 1:200) to identify interneurons. After three washes for 5 min  
512 each in PBS, secondary antibodies were applied along with 0.1% Triton X-100 for 1 hr. For secondary

513 antibodies, we used Alexa Fluoro 488-conjugated donkey anti-chicken (Invitrogen, 1:500) or Alexa Fluoro  
514 594-conjugated donkey anti-rabbit (Invitrogen, 1:500). All brain slices were mounted in Vector Shield  
515 mounting solution. Coronal images were acquired via a stereomicroscope at low zoom (2-4 $\times$ ), at high zoom  
516 with Zeiss ApoTome.2 (20 $\times$ /0.8NA, optical section step of 0.5  $\mu$ m), or on a confocal microscope (Zeiss  
517 LSM 800, 63 $\times$ /1.4 NA oil immersion, optical section step of 0.5  $\mu$ m). For rabies tracing, cells were  
518 manually counted on individual coronal slices with the brain region determined using a standard mouse  
519 brain atlas<sup>58</sup>. We counted 282 $\pm$ 56, 409 $\pm$ 76, and 242 $\pm$ 42 mCherry (+) cells (mean  $\pm$  s.e.m.) when CT, CP,  
520 and L4 pyramidal cells were starter cells, respectively.

521

### 522 **Analysis of Two-Photon Imaging data**

523 Imaging data were processed with custom programs written in MATLAB (Mathworks®) and Fiji<sup>59</sup>. Images  
524 were registered with an iterative cross-correlation-based registration algorithm<sup>57</sup>. Cortical neurons were  
525 outlined by hand as regions of interest (ROIs). The averaged fluorescent signal within the ROI was used to  
526 calculate calcium transients. For each ROI, we used the mode from the fluorescence intensity histogram as  
527 the baseline fluorescence  $F_0$ , and calculate its calcium transient as  $\Delta F/F$  (%) =  $(F - F_0)/F_0 \times 100$ . The final  
528 calcium transient to each visual stimulus was the average of ten trials.

529 We calculated the mean of the  $\Delta F/F$  values that were 99% or above in the calcium transient distribution  
530 of each ROI during an imaging session. A neuron was considered active if this mean value of its  
531 corresponding ROI was above 50%. We compared this criterion with our previously used one (the  
532 maximum of mean  $\Delta F/F$  during the presentation of visual stimuli was above 10%<sup>57</sup>) on data of CT neurons  
533 in the drifting grating sessions (1503 cells, 10 mice). We found very similar percentages of active neurons  
534 (85.3% versus 83.6%, new versus old criterion), suggesting that the two criteria were equivalent in  
535 identifying active neurons. Since the new criterion allowed the evaluation of spontaneous activity, we used  
536 this criterion throughout our analysis. Of 2066 CP cells outlined from 17 mice, 1876 (90.8%) were active.  
537 A neuron was considered as visually-evoked if its activity during at least one visual stimulus was  
538 significantly higher than their activity during the inter-stimulus period by paired t test ( $P < 0.01$ )<sup>31</sup>. Under  
539 this criterion, the percentages of visually-evoked neurons among all active neurons were: CT 62%,  
540 796/1282, 10 mice; CP 26%, 483/1876, 17 mice.

541

### 542 **Analysis of Orientation Selectivity of individual neurons**

543 The orientation selectivity index (OSI), directional selectivity index (DSI), global OSI, global DSI, and  
544 tuning full width at half maxima (FWHM) was defined based on previous publications<sup>57, 60, 61</sup>. Briefly,  
545 the response  $R$  of each ROI to a visual stimulus was defined as the average  $\Delta F/F$  across the 6-s window  
546 of drifting grating presentation. For ROIs with significantly different responses across the drifting



547 directions (one-way ANOVA,  $P < 0.05$ ), we fit their normalized response tuning curves to grating  
548 drifting angle  $\theta$  with a bimodal Gaussian function. The tuning width for the preferred orientation is  
549 calculated as the full width at half maximum (FWHM) of the Gaussian function. OSI was computed as  
550  $(R_{\text{pref}} - R_{\text{ortho}}) / (R_{\text{pref}} + R_{\text{ortho}})$ , with  $R_{\text{pref}}$  and  $R_{\text{ortho}}$  being the responses at the preferred and orthogonal  
551 orientations, respectively. With this index, perfect orientation selectivity would give  $\text{OSI} = 1$ ; an equal  
552 response to all orientations would have  $\text{OSI} = 0$ . DSI was defined as  $(R_{\text{pref}} - R_{\text{ortho}}) / (R_{\text{pref}} + R_{\text{ortho}})$ , where  $R_{\text{pref}}$   
553 and  $R_{\text{ortho}}$  are the responses at the preferred motion direction and its opposite, respectively. Global OSI  
554 was calculated as the magnitude of the vector average divided by the sum of all responses:  $\text{gOSI} =$   
555  $|\sum_k R(\theta_k) e^{i2\theta_k}| / \sum_k R(\theta_k)$ , where  $R(\theta)$  is the measured response at orientation  $\theta$ , and global DSI was defined as  
556  $|\sum_k R(\theta_k) e^{i\theta_k}| / \sum_k R(\theta_k)$ .

557

### 558 **Statistical Tests**

559 Standard functions and custom-written scripts in MATLAB were used to perform all analysis. The data  
560 were tested for normal distribution. Parametric tests were used for normally distributed data and non-  
561 parametric tests were applied to all other data. Bar graphs and mean  $\pm$  SEM were used to describe the  
562 data with normal distribution, while boxplots and median  $\pm$  IQR were used to describe the non-normally  
563 distributed data. Boxplots represent median and 25<sup>th</sup> - 75<sup>th</sup> percentiles and their whiskers shown in Tukey  
564 style (plus or minus 1.5 times IQR). A nonparametric test (Wilcoxon signed rank test) was used to  
565 examine paired data in Figure 1F, Figure 7E and 7F. Direct non-paired comparisons between two groups  
566 were made using Wilcoxon rank sum test for non-normally distributed data (Figure 5I-5O, 6C, 6E, 6F,  
567 6H). The statistical significance was defined as \* $p < 0.05$ , \*\* $p < 0.01$ , \*\*\* $p < 0.001$ , respectively.  
568 Experiments were not performed blind. Sample sizes were not predetermined by statistical methods, but  
569 were based on those commonly used in the field. Medians, IQR, means and SEM are reported throughout  
570 the text.

571

### 572 **Acknowledgements**

573 We thank Shuo Chen, Jianhua Cang, and Hillel Adesnik for helpful suggestions on the manuscript, Amy  
574 Hu for histology, and Kim Ritola for virus preparation. Y.L., W.S., R.L., and N.J. were supported by  
575 Howard Hughes Medical Institute. M.C. was supported by National Natural Science Foundation of China  
576 (31700909). N.J. was supported by National Institutes of Health (U19NS107613).

577

578

579 **Author contributions**

580 N.J., Y.L. and W.S. designed the research. W.S. established awake imaging. R.L. built the pupil tracking  
581 device. W.S. and R.L. contributed codes for analysis of data. Y.L. and W.J. performed imaging experiment.  
582 Y.L. injected and implanted mice and performed histology. Y.L. analyzed two-photon imaging data. M.C.  
583 conducted the whole-cell electrophysiological recordings supervised by W.S. N.J. supervised research. Y.L.  
584 and N.J. wrote the manuscript.

585

586 **Competing interests**

587 The authors declare no competing interests.

588

589 **Materials & Correspondence**

590 All data are available from the Lead Contact, Na Ji ([jina@berkeley.edu](mailto:jina@berkeley.edu)), upon request.

591

592 **REFERENCES**

- 593 1. Zaidel E, Iacoboni M. *The parallel brain: the cognitive neuroscience of the corpus callosum*.  
594 MIT press (2003).
- 595 2. Yorke CH, Jr., Caviness VS, Jr. Interhemispheric neocortical connections of the corpus callosum  
596 in the normal mouse: a study based on anterograde and retrograde methods. *J Comp Neurol* **164**,  
597 233-245 (1975).
- 598 3. Ramos RL, Tam DM, Brumberg JC. Physiology and morphology of callosal projection neurons  
599 in mouse. *Neuroscience* **153**, 654-663 (2008).
- 600 4. Fame RM, MacDonald JL, Macklis JD. Development, specification, and diversity of callosal  
601 projection neurons. *Trends Neurosci* **34**, 41-50 (2011).
- 602 5. Shuler MG, Krupa DJ, Nicolelis MAL. Bilateral Integration of Whisker Information in the  
603 Primary Somatosensory Cortex of Rats. *The Journal of Neuroscience* **21**, 5251-5261 (2001).
- 604 6. Hlushchuk Y, Hari R. Transient Suppression of Ipsilateral Primary Somatosensory Cortex during  
605 Tactile Finger Stimulation. *The Journal of Neuroscience* **26**, 5819-5824 (2006).
- 606 7. Rock C, Apicella AJ. Callosal projections drive neuronal-specific responses in the mouse  
607 auditory cortex. *The Journal of neuroscience : the official journal of the Society for Neuroscience*  
608 **35**, 6703-6713 (2015).
- 609  
610  
611  
612  
613  
614

- 615  
616 8. Lewis JW, Olavarria JF. Two rules for callosal connectivity in striate cortex of the rat. *J Comp*  
617 *Neurol* **361**, 119-137 (1995).
- 618  
619 9. Wang Q, Burkhalter A. Area map of mouse visual cortex. *J Comp Neurol* **502**, 339-357 (2007).
- 620  
621 10. Stryker MP, Antonini A. Factors shaping the corpus callosum. *J Comp Neurol* **433**, 437-440  
622 (2001).
- 623  
624 11. Pietrasanta M, Restani L, Caleo M. The corpus callosum and the visual cortex: plasticity is a  
625 game for two. *Neural Plast* **2012**, 838672 (2012).
- 626  
627 12. Dehmel S, Lowel S. Cortico-cortical interactions influence binocularity of the primary visual  
628 cortex of adult mice. *PLoS One* **9**, e105745 (2014).
- 629  
630 13. Payne BR, Siwek DF, Lomber SG. Complex transcallosal interactions in visual cortex. *Vis*  
631 *Neurosci* **6**, 283-289 (1991).
- 632  
633 14. Zhao X, Liu M, Cang J. Sublinear binocular integration preserves orientation selectivity in mouse  
634 visual cortex. *Nat Commun* **4**, 2088 (2013).
- 635  
636 15. Cusick CG, Lund RD. The distribution of the callosal projection to the occipital visual cortex in  
637 rats and mice. *Brain Res* **214**, 239-259 (1981).
- 638  
639 16. Olavarria J, Van Sluyters RC. Widespread callosal connections in infragranular visual cortex of  
640 the rat. *Brain Res* **279**, 233-237 (1983).
- 641  
642 17. Harris KD, Shepherd GM. The neocortical circuit: themes and variations. *Nat Neurosci* **18**, 170-  
643 181 (2015).
- 644  
645 18. Kobbert C, Apps R, Bechmann I, Lanciego JL, Mey J, Thanos S. Current concepts in  
646 neuroanatomical tracing. *Prog Neurobiol* **62**, 327-351 (2000).
- 647  
648 19. Tervo DG, *et al.* A Designer AAV Variant Permits Efficient Retrograde Access to Projection  
649 Neurons. *Neuron* **92**, 372-382 (2016).
- 650  
651 20. Peron SP, Freeman J, Iyer V, Guo C, Svoboda K. A Cellular Resolution Map of Barrel Cortex  
652 Activity during Tactile Behavior. *Neuron* **86**, 783-799 (2015).
- 653  
654 21. Gong S, *et al.* Targeting Cre recombinase to specific neuron populations with bacterial artificial  
655 chromosome constructs. *The Journal of neuroscience : the official journal of the Society for*  
656 *Neuroscience* **27**, 9817-9823 (2007).

- 657  
658 22. Olsen SR, Bortone DS, Adesnik H, Scanziani M. Gain control by layer six in cortical circuits of  
659 vision. *Nature* **483**, 47-52 (2012).
- 660  
661 23. Bortone DS, Olsen SR, Scanziani M. Translaminar inhibitory cells recruited by layer 6  
662 corticothalamic neurons suppress visual cortex. *Neuron* **82**, 474-485 (2014).
- 663  
664 24. Madisen L, *et al.* A robust and high-throughput Cre reporting and characterization system for the  
665 whole mouse brain. *Nat Neurosci* **13**, 133-140 (2010).
- 666  
667 25. Zhang ZW, Deschenes M. Intracortical axonal projections of lamina VI cells of the primary  
668 somatosensory cortex in the rat: a single-cell labeling study. *The Journal of neuroscience : the*  
669 *official journal of the Society for Neuroscience* **17**, 6365-6379 (1997).
- 670  
671 26. Wang Q, Gao E, Burkhalter A. Gateways of ventral and dorsal streams in mouse visual cortex.  
672 *The Journal of neuroscience : the official journal of the Society for Neuroscience* **31**, 1905-1918  
673 (2011).
- 674  
675 27. Wickersham IR, Finke S, Conzelmann KK, Callaway EM. Retrograde neuronal tracing with a  
676 deletion-mutant rabies virus. *Nature methods* **4**, 47-49 (2007).
- 677  
678 28. Lien AD, Scanziani M. Tuned thalamic excitation is amplified by visual cortical circuits. *Nat*  
679 *Neurosci* **16**, 1315-1323 (2013).
- 680  
681 29. Chen T-W, *et al.* Ultrasensitive fluorescent proteins for imaging neuronal activity. *Nature* **499**,  
682 295-300 (2013).
- 683  
684 30. Ji N, Milkie DE, Betzig E. Adaptive optics via pupil segmentation for high-resolution imaging in  
685 biological tissues. *Nature methods* **7**, 141-147 (2010).
- 686  
687 31. Tan Z, Sun W, Chen TW, Kim D, Ji N. Neuronal Representation of Ultraviolet Visual Stimuli in  
688 Mouse Primary Visual Cortex. *Scientific reports* **5**, 12597 (2015).
- 689  
690 32. Velez-Fort M, *et al.* The stimulus selectivity and connectivity of layer six principal cells reveals  
691 cortical microcircuits underlying visual processing. *Neuron* **83**, 1431-1443 (2014).
- 692  
693 33. Ohki K, Chung S, Ch'ng YH, Kara P, Reid RC. Functional imaging with cellular resolution  
694 reveals precise micro-architecture in visual cortex. *Nature* **433**, 597-603 (2005).
- 695  
696 34. Dana H, *et al.* Sensitive red protein calcium indicators for imaging neural activity. *Elife* **5**,  
697 (2016).
- 698

- 699 35. McGinley MJ, *et al.* Waking State: Rapid Variations Modulate Neural and Behavioral Responses.  
700 *Neuron* **87**, 1143-1161 (2015).
- 701  
702 36. Elberger AJ. Selective labeling of visual corpus callosum connections with aspartate in cat and  
703 rat. *Vis Neurosci* **2**, 81-85 (1989).
- 704  
705 37. Gau R, Bazin P-L, Trampel R, Turner R, Noppeney U. Resolving multisensory and attentional  
706 influences across cortical depth in sensory cortices. *bioRxiv*, 548933 (2019).
- 707  
708 38. Morrill RJ, Hasenstaub AR. Visual Information Present in Infragranular Layers of Mouse  
709 Auditory Cortex. *The Journal of neuroscience : the official journal of the Society for*  
710 *Neuroscience* **38**, 2854-2862 (2018).
- 711  
712 39. Petro LS, Paton AT, Muckli L. Contextual modulation of primary visual cortex by auditory  
713 signals. *Philos Trans R Soc Lond B Biol Sci* **372**, (2017).
- 714  
715 40. Meijer GT, Montijn JS, Pennartz CMA, Lansink CS. Audiovisual Modulation in Mouse Primary  
716 Visual Cortex Depends on Cross-Modal Stimulus Configuration and Congruency. *The Journal of*  
717 *neuroscience : the official journal of the Society for Neuroscience* **37**, 8783-8796 (2017).
- 718  
719 41. Sundberg SC, Lindstrom SH, Sanchez GM, Granseth B. Cre-expressing neurons in visual cortex  
720 of Ntsr1-Cre GN220 mice are corticothalamic and are depolarized by acetylcholine. *J Comp*  
721 *Neurol* **526**, 120-132 (2018).
- 722  
723 42. Felleman DJ, Van Essen DC. Distributed hierarchical processing in the primate cerebral cortex.  
724 *Cereb Cortex* **1**, 1-47 (1991).
- 725  
726 43. Coogan TA, Burkhalter A. Hierarchical organization of areas in rat visual cortex. *The Journal of*  
727 *neuroscience : the official journal of the Society for Neuroscience* **13**, 3749-3772 (1993).
- 728  
729 44. Rockland KS, Ojima H. Multisensory convergence in calcarine visual areas in macaque monkey.  
730 *Int J Psychophysiol* **50**, 19-26 (2003).
- 731  
732 45. Sanchez-Vives MV, McCormick DA. Cellular and network mechanisms of rhythmic recurrent  
733 activity in neocortex. *Nat Neurosci* **3**, 1027-1034 (2000).
- 734  
735 46. Timofeev I, Grenier F, Bazhenov M, Sejnowski TJ, Steriade M. Origin of slow cortical  
736 oscillations in deafferented cortical slabs. *Cereb Cortex* **10**, 1185-1199 (2000).
- 737  
738 47. MacLean JN, Watson BO, Aaron GB, Yuste R. Internal dynamics determine the cortical response  
739 to thalamic stimulation. *Neuron* **48**, 811-823 (2005).
- 740

- 741 48. Sakata S, Harris KD. Laminar structure of spontaneous and sensory-evoked population activity in  
742 auditory cortex. *Neuron* **64**, 404-418 (2009).
- 743  
744 49. Tan AY. Spatial diversity of spontaneous activity in the cortex. *Front Neural Circuits* **9**, 48  
745 (2015).
- 746  
747 50. Kayama Y, Riso RR, Bartlett JR, Doty RW. Luxotonic responses of units in macaque striate  
748 cortex. *J Neurophysiol* **42**, 1495-1517 (1979).
- 749  
750 51. Gur M, Kagan I, Snodderly DM. Orientation and direction selectivity of neurons in V1 of alert  
751 monkeys: functional relationships and laminar distributions. *Cereb Cortex* **15**, 1207-1221 (2005).
- 752  
753 52. Snodderly DM, Gur M. Organization of striate cortex of alert, trained monkeys (*Macaca*  
754 *fascicularis*): ongoing activity, stimulus selectivity, and widths of receptive field activating  
755 regions. *J Neurophysiol* **74**, 2100-2125 (1995).
- 756  
757 53. Polack PO, Guillemain I, Hu E, Deransart C, Depaulis A, Charpier S. Deep layer somatosensory  
758 cortical neurons initiate spike-and-wave discharges in a genetic model of absence seizures. *The*  
759 *Journal of neuroscience : the official journal of the Society for Neuroscience* **27**, 6590-6599  
760 (2007).
- 761  
762 54. Petersen CC, Hahn TT, Mehta M, Grinvald A, Sakmann B. Interaction of sensory responses with  
763 spontaneous depolarization in layer 2/3 barrel cortex. *Proc Natl Acad Sci U S A* **100**, 13638-  
764 13643 (2003).
- 765  
766 55. Ji D, Wilson MA. Coordinated memory replay in the visual cortex and hippocampus during sleep.  
767 *Nat Neurosci* **10**, 100-107 (2007).
- 768  
769 56. Luczak A, McNaughton BL, Harris KD. Packet-based communication in the cortex. *Nat Rev*  
770 *Neurosci* **16**, 745-755 (2015).
- 771  
772 57. Sun W, Tan Z, Mensh BD, Ji N. Thalamus provides layer 4 of primary visual cortex with  
773 orientation- and direction-tuned inputs. *Nat Neurosci* **19**, 308-315 (2016).
- 774  
775 58. Franklin KBJ, Paxinos G. *Paxinos and Franklin's The mouse brain in stereotaxic coordinates*  
776 (2013).
- 777  
778 59. Schindelin J, *et al.* Fiji: an open-source platform for biological-image analysis. *Nature methods* **9**,  
779 676-682 (2012).
- 780  
781 60. Niell CM, Stryker MP. Highly selective receptive fields in mouse visual cortex. *The Journal of*  
782 *neuroscience : the official journal of the Society for Neuroscience* **28**, 7520-7536 (2008).
- 783

- 784 61. Marshel JH, Garrett ME, Nauhaus I, Callaway EM. Functional specialization of seven mouse  
785 visual cortical areas. *Neuron* **72**, 1040-1054 (2011).
